# Supplementary material for: Ube2v1-mediated ubiquitination and degradation of Sirt1 promotes metastasis of colorectal cancer by epigenetically suppressing autophagy
Source: Springer Nature journal article supplement (doi:10.1186/s13045-018-0638-9), 2018-07-17

**A**

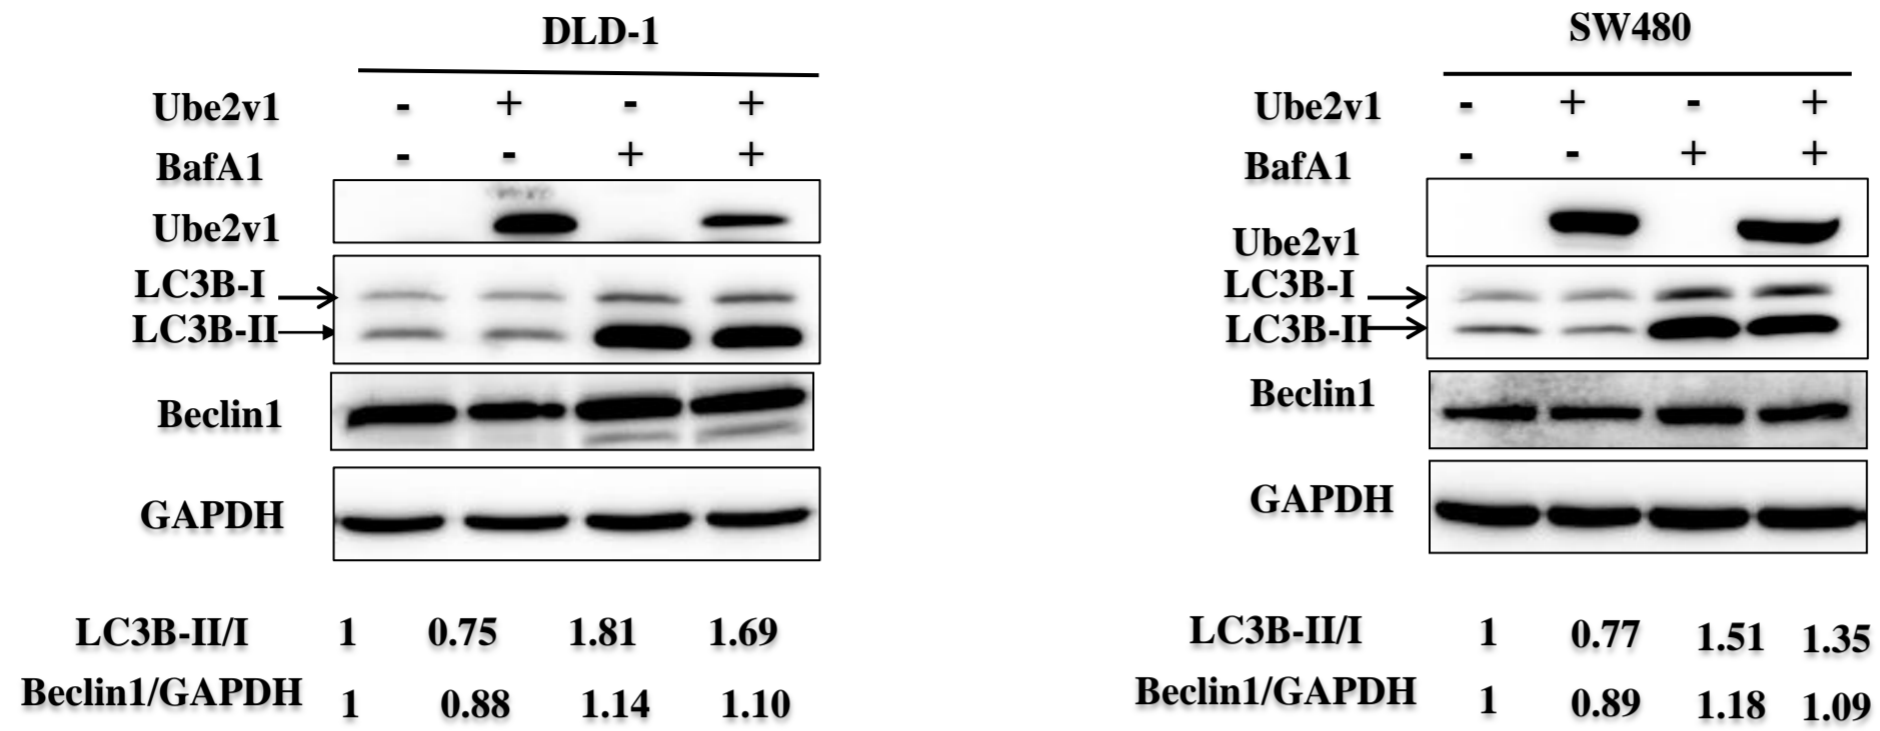

**B**

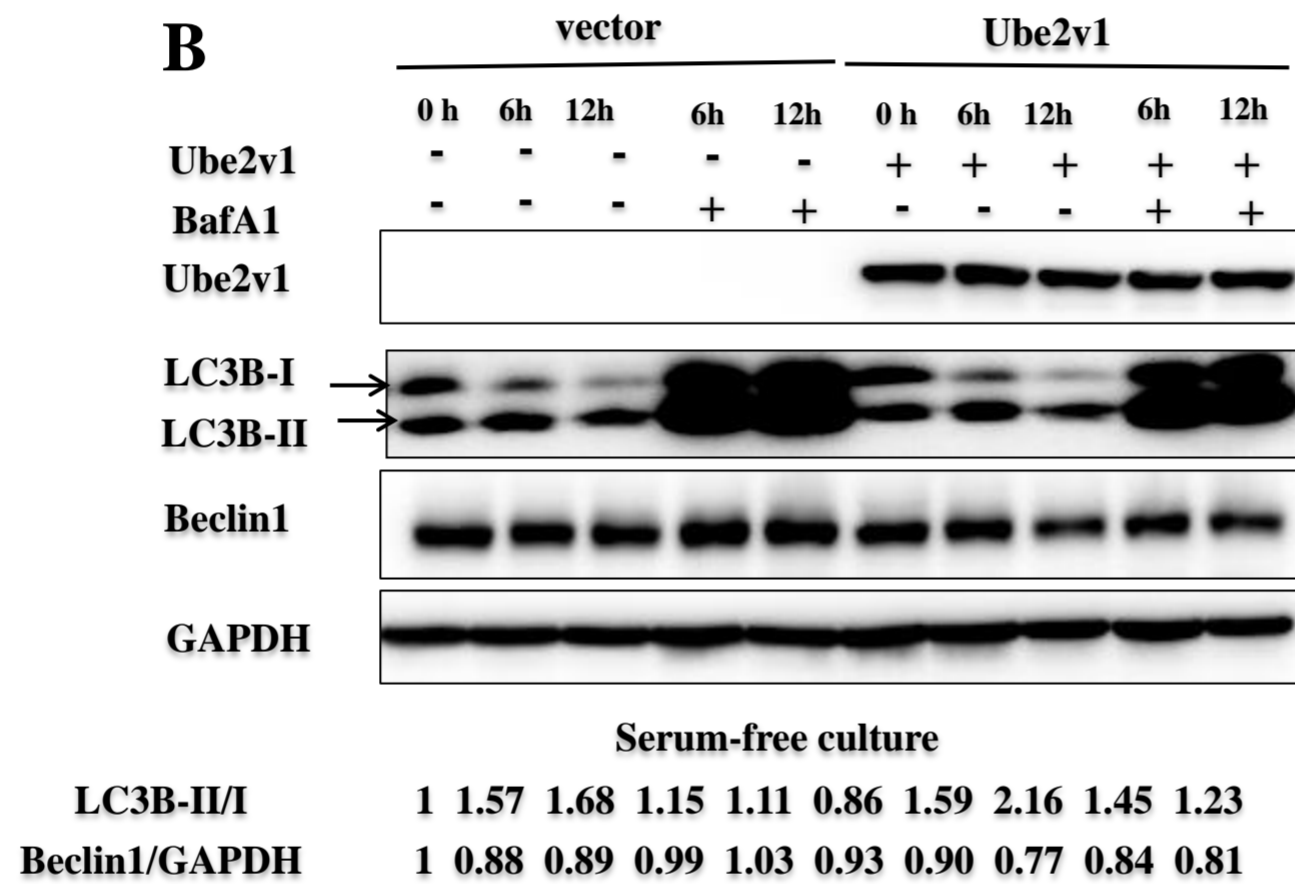

Figure S2

**A**

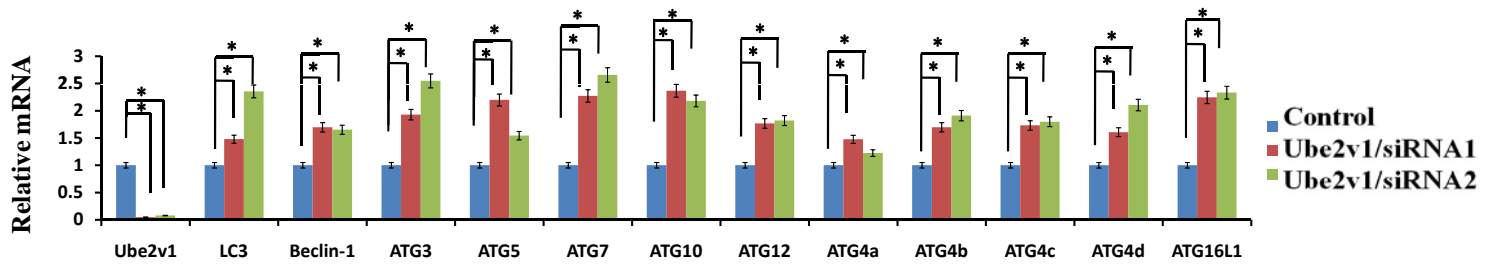

**B**

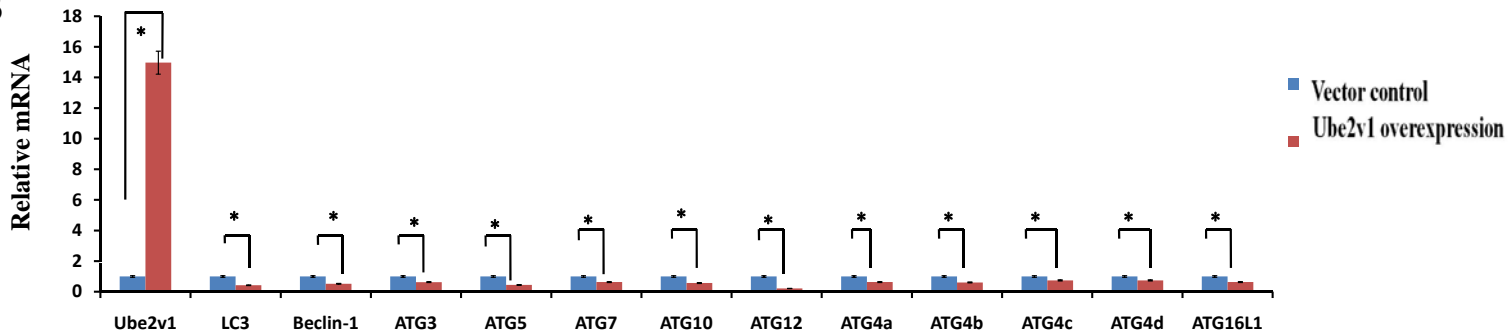

**C**

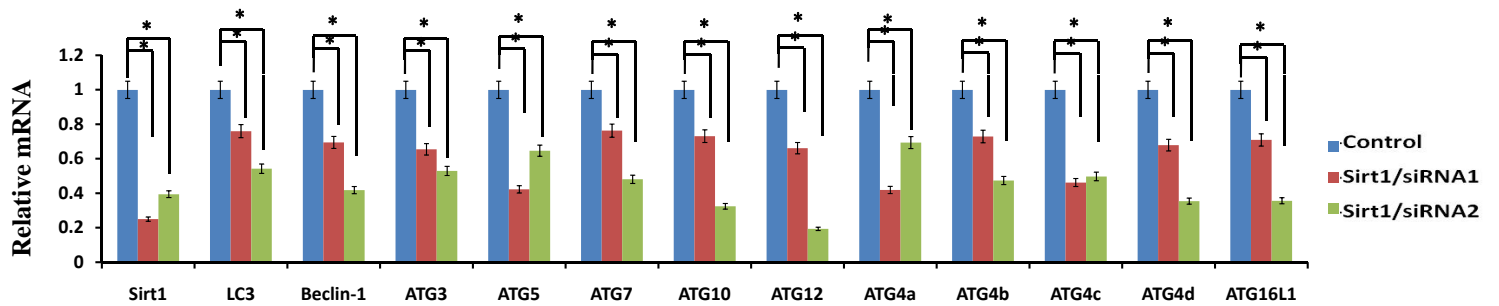

**D**

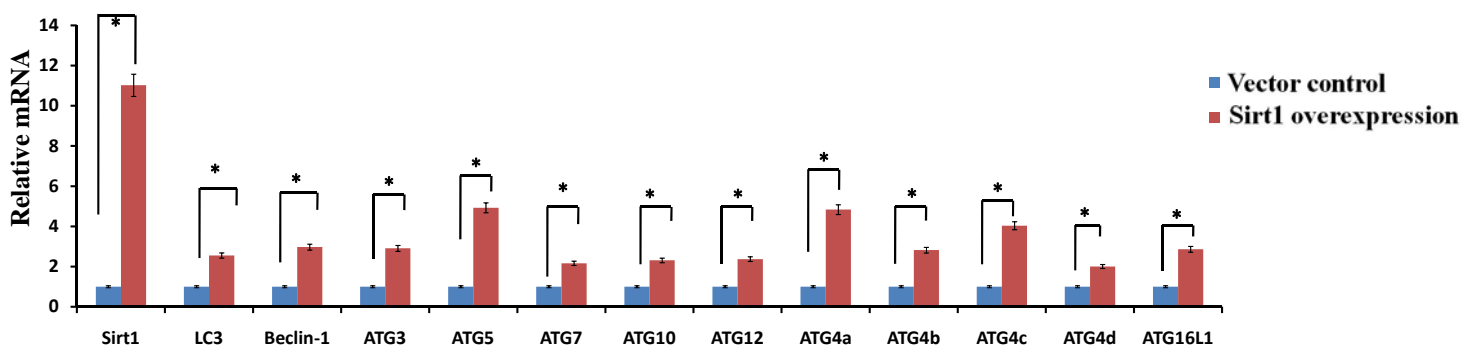

**Figure S3**

**A**

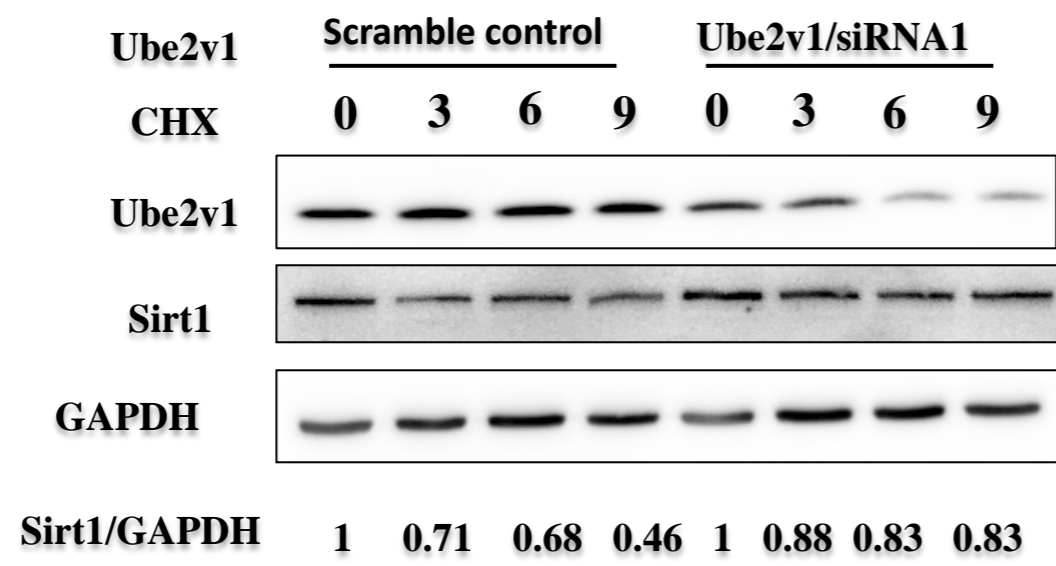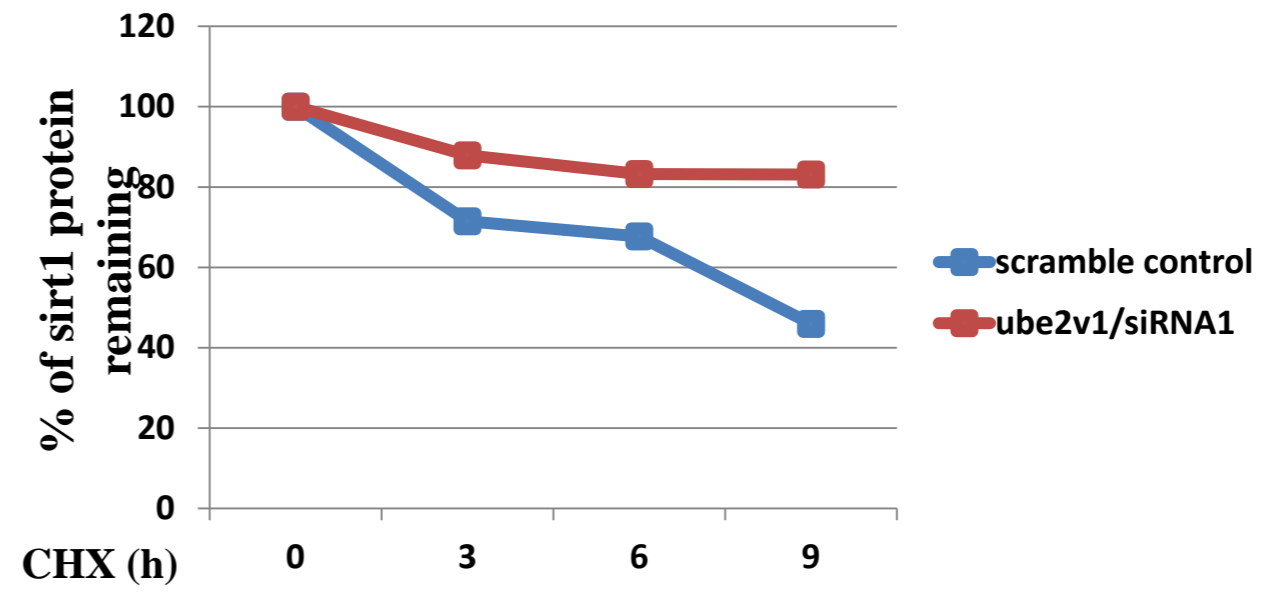

**B**

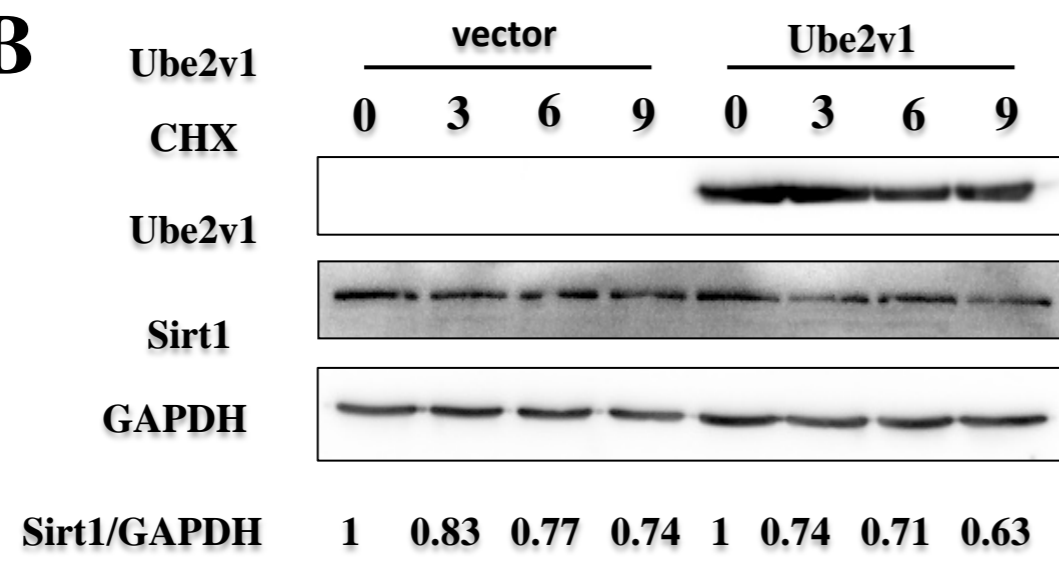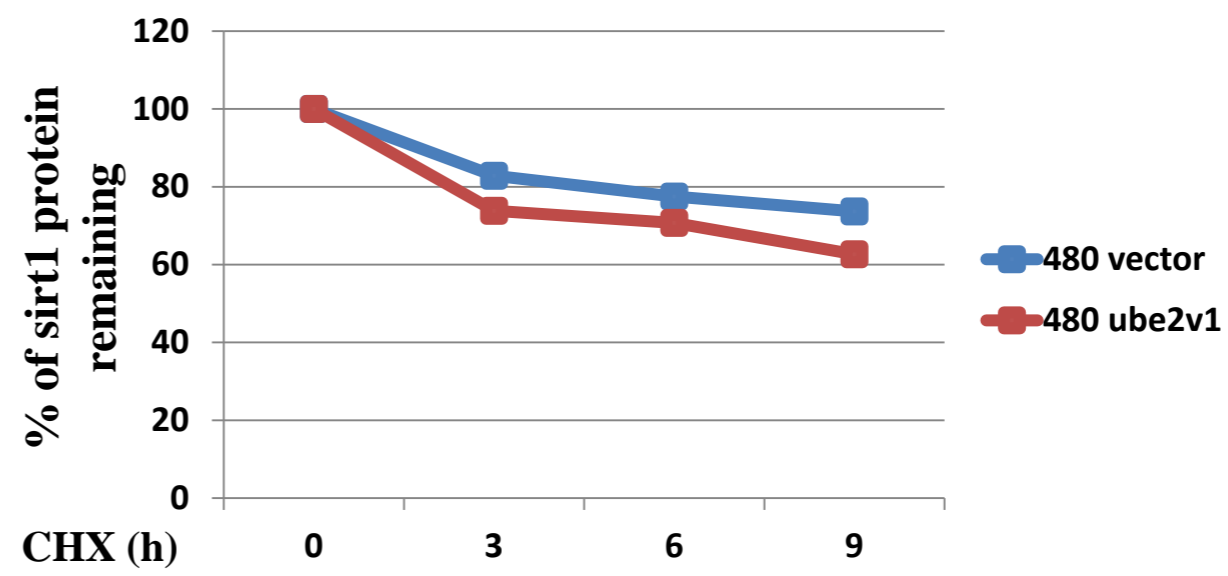

**C**

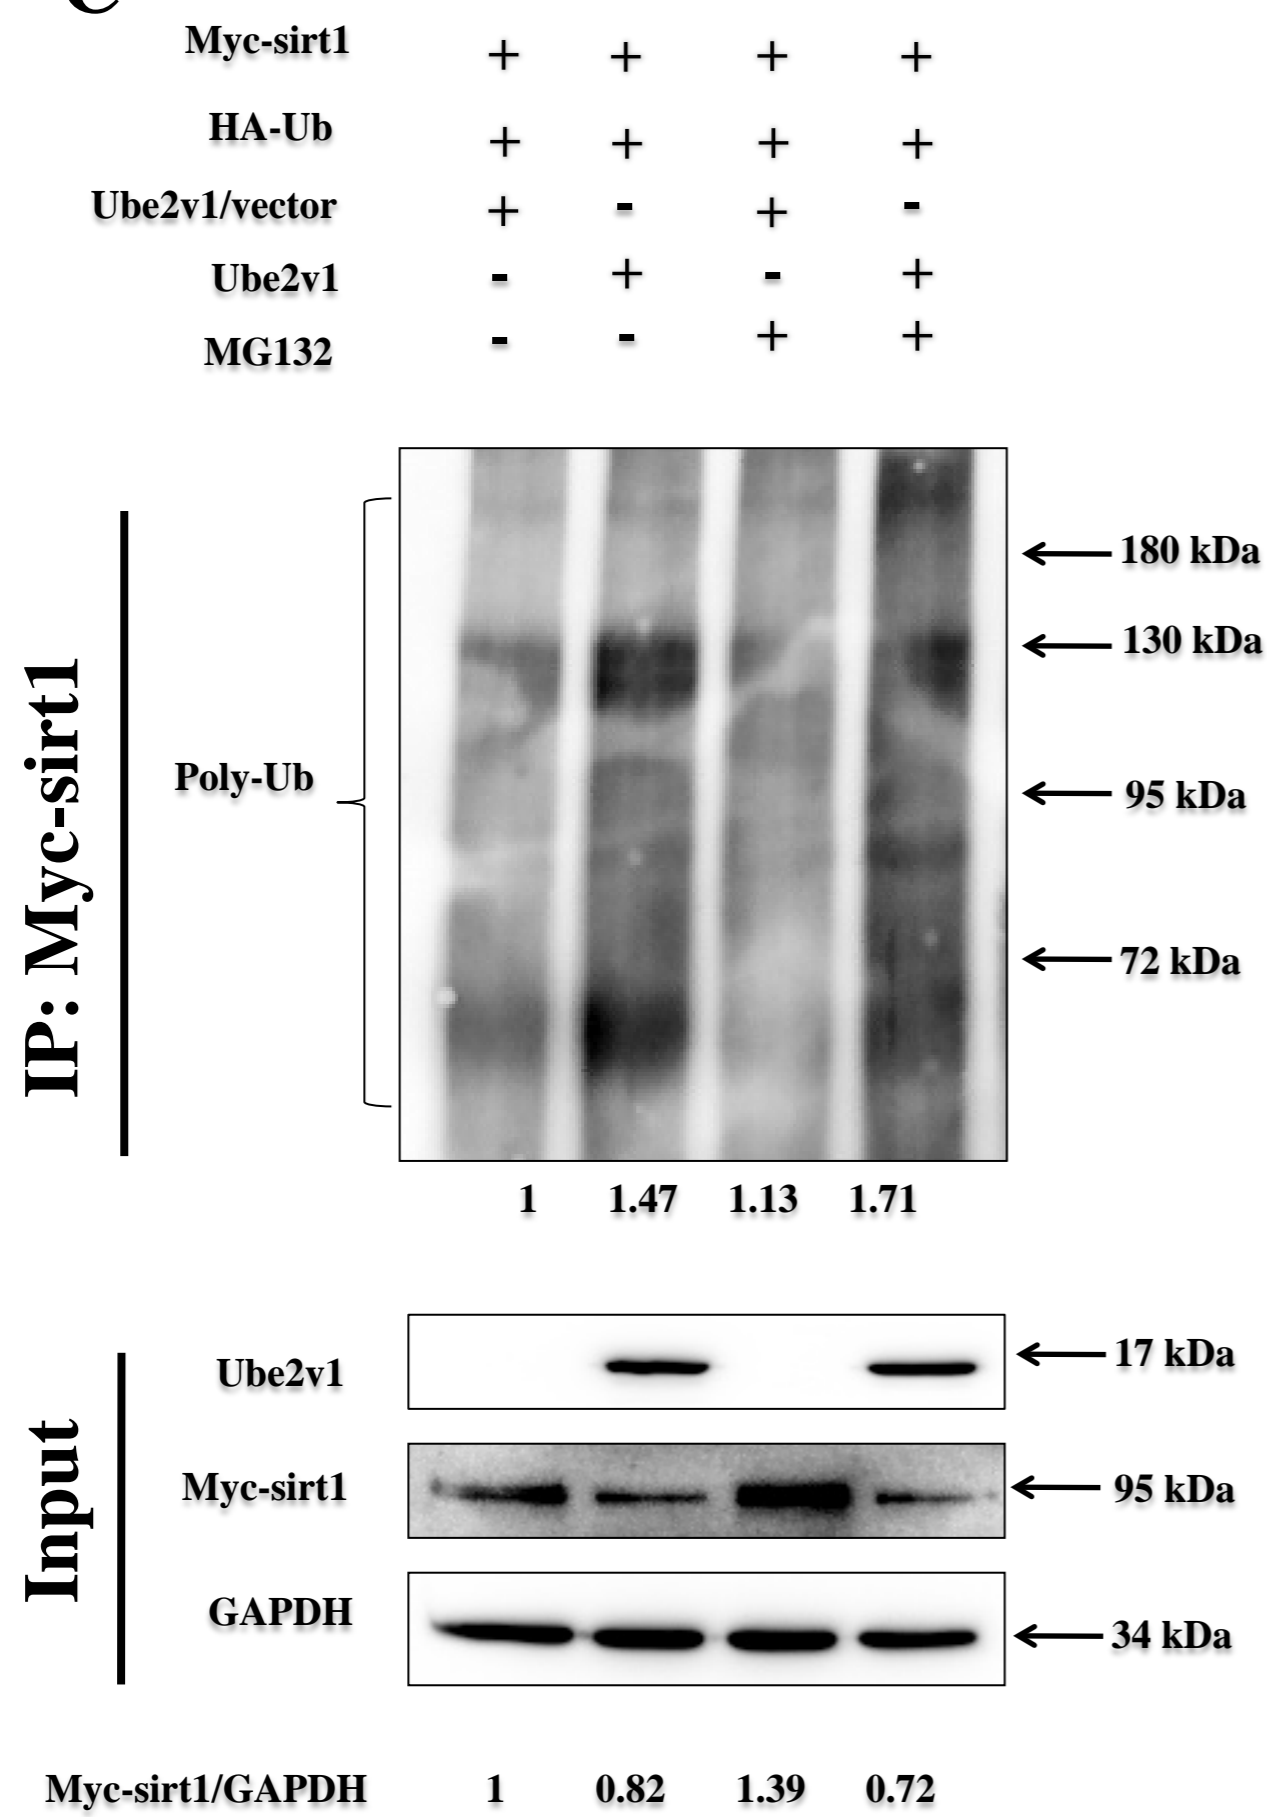

**D**

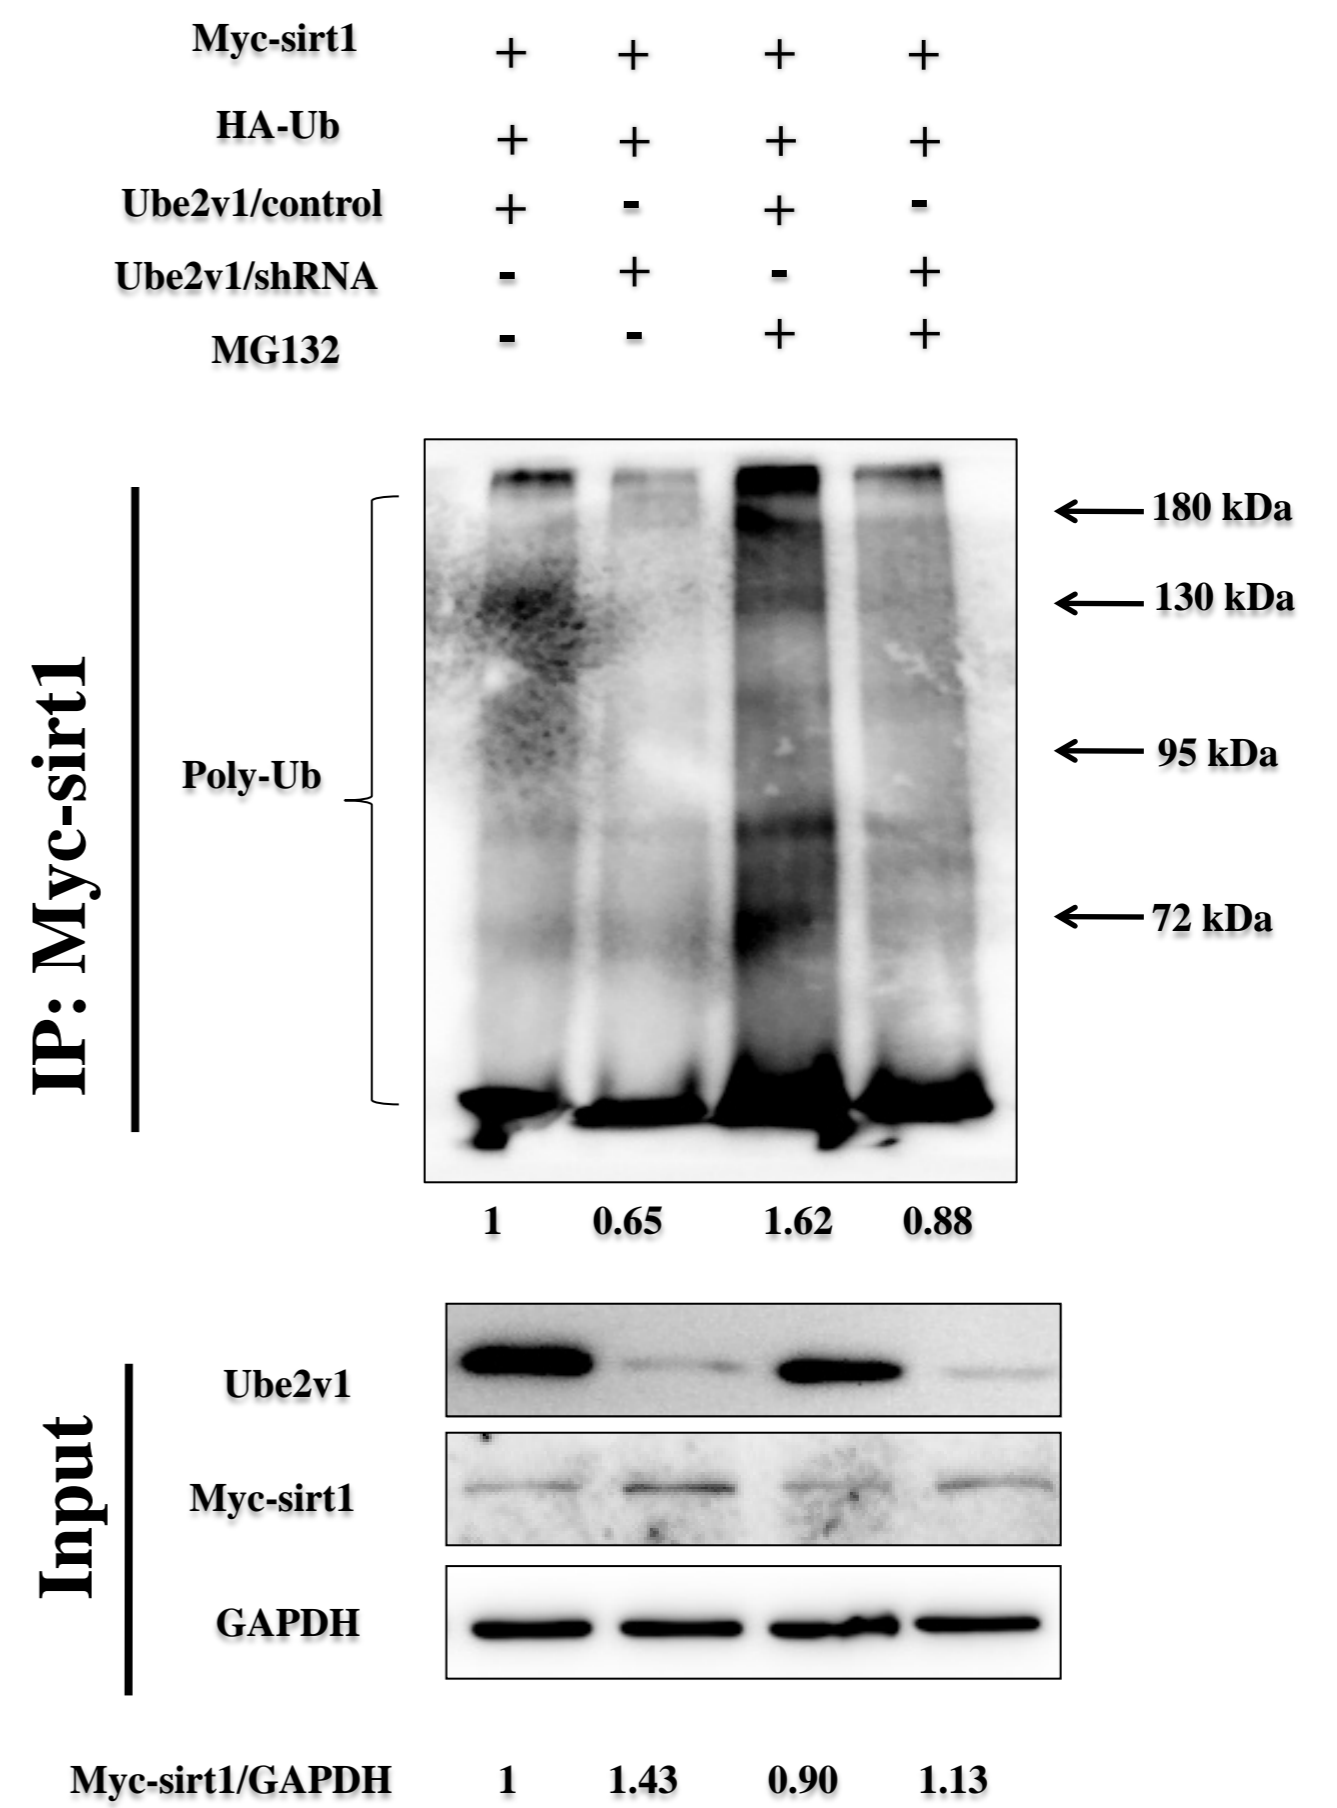

**Figure S4**

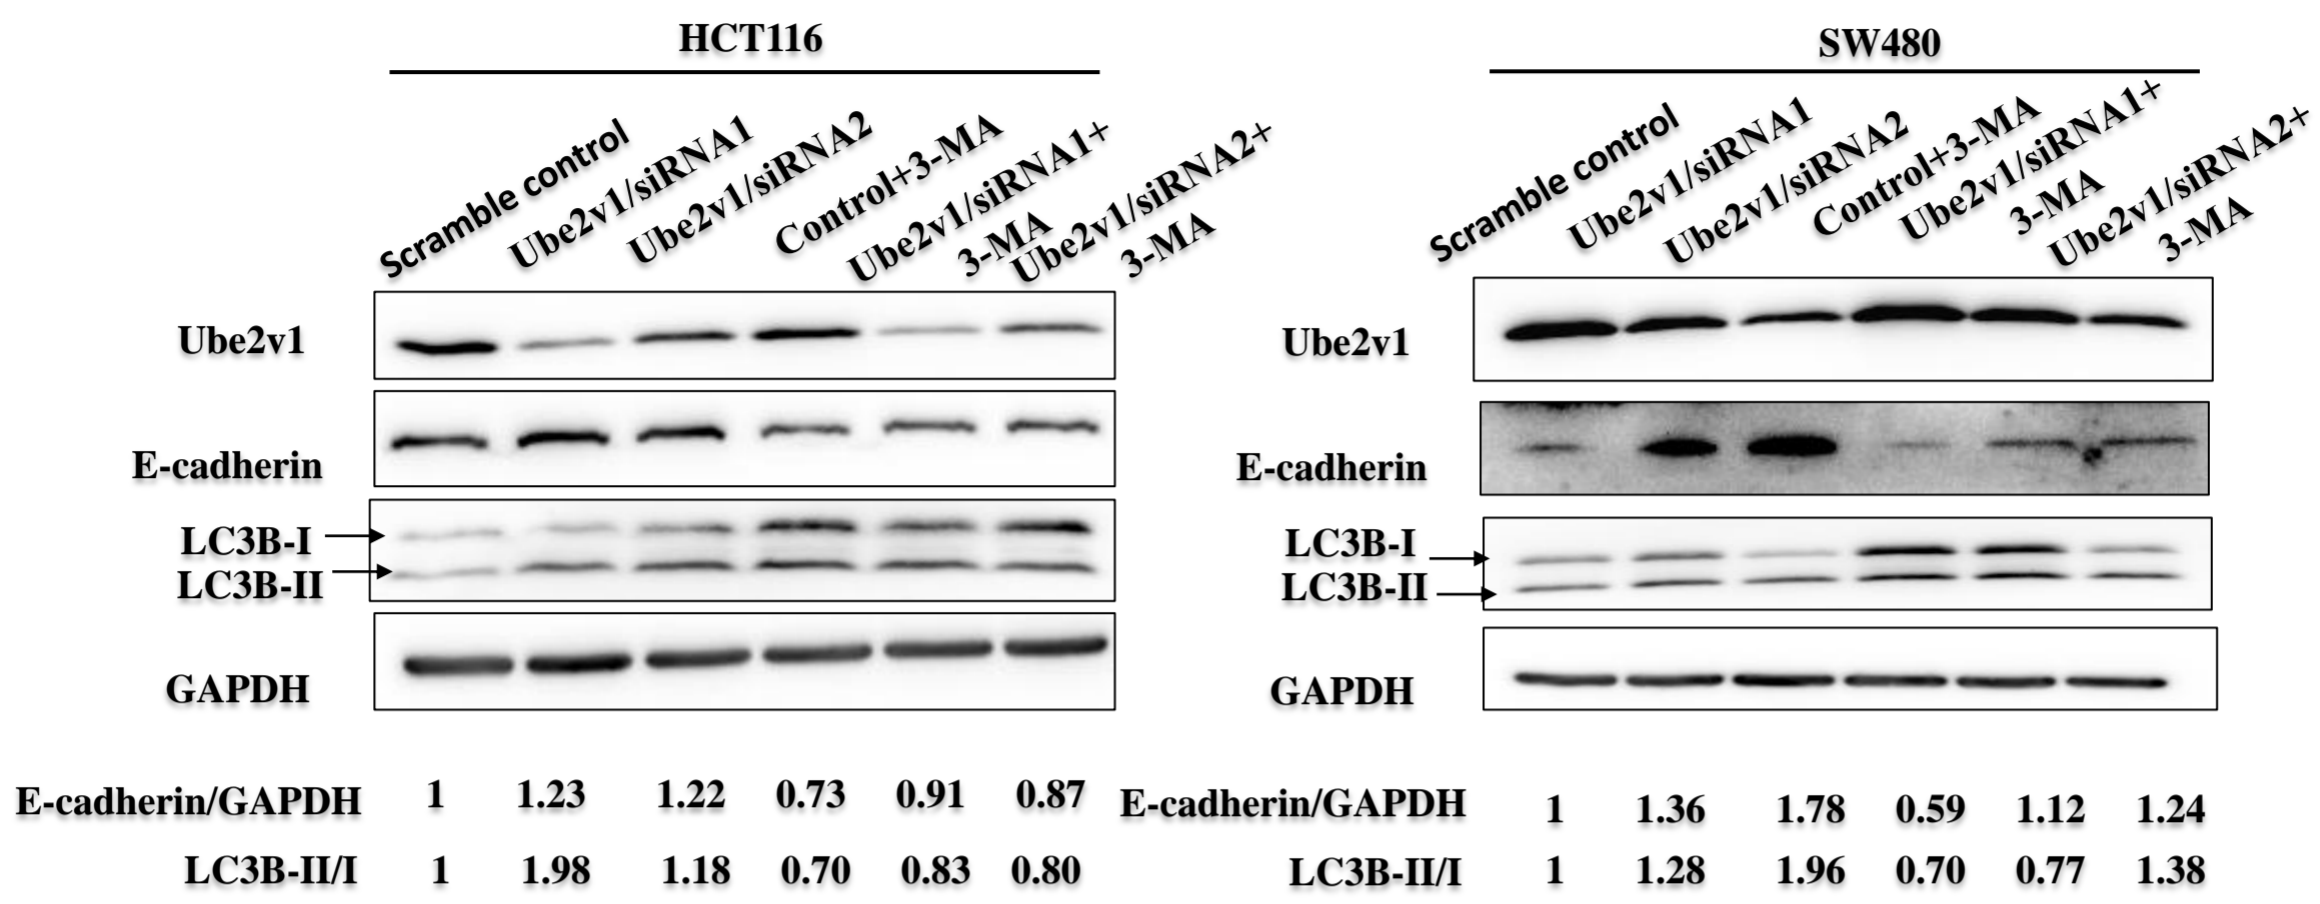

**Figure S5**

**A**

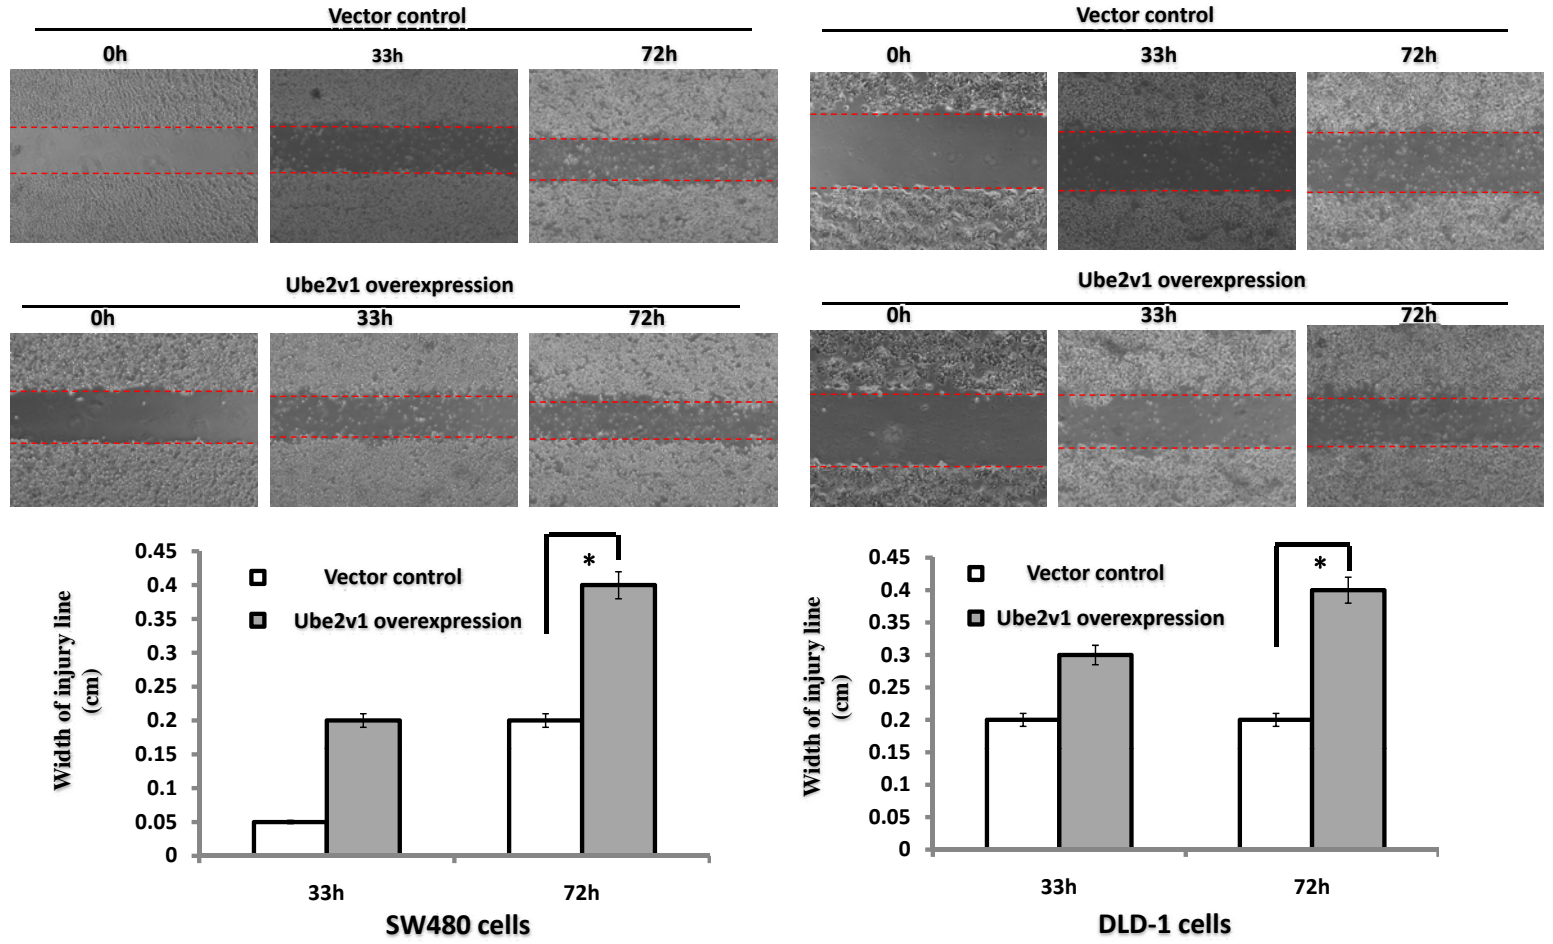

**B**

**Migration**

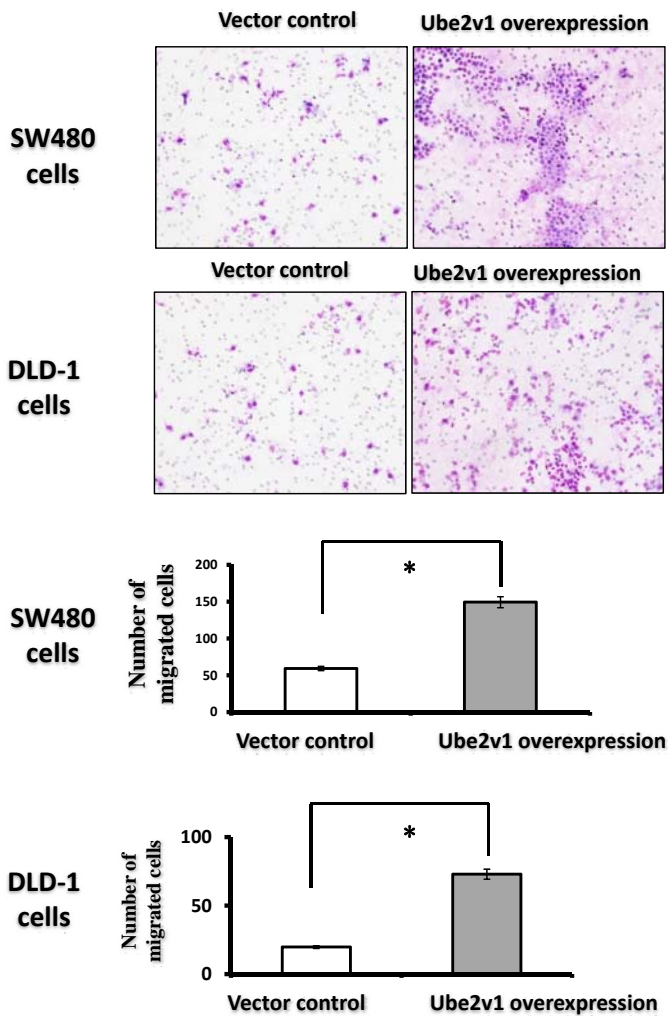

**C**

**Invasion**

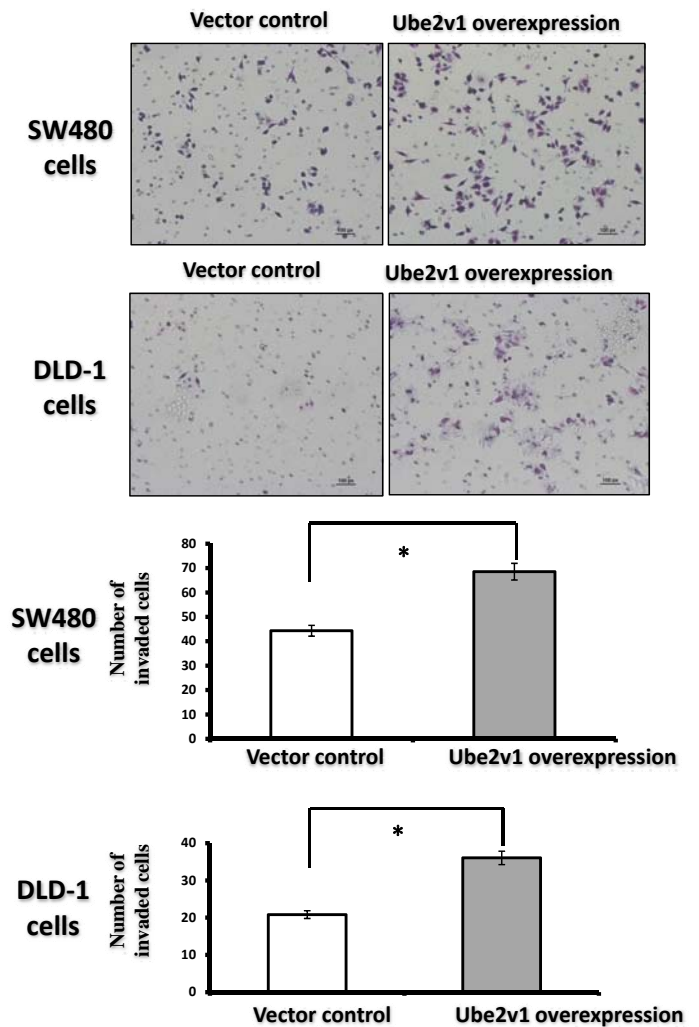

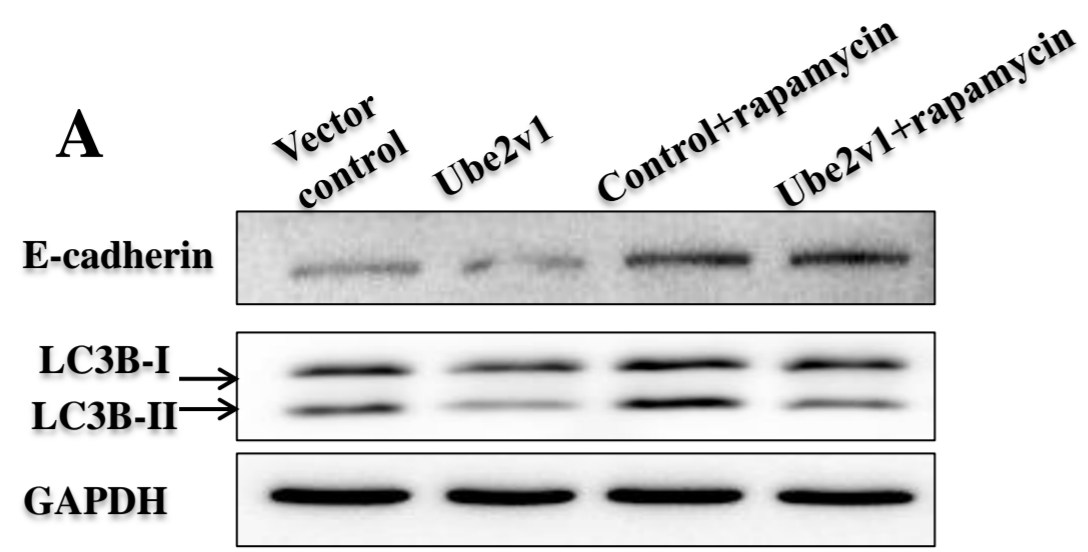

|                  |   |      |      |      |
|------------------|---|------|------|------|
| E-cadherin/GAPDH | 1 | 0.86 | 1.81 | 1.60 |
| LC3B-II/I        | 1 | 0.64 | 1.19 | 0.75 |

**B**

**Migration**

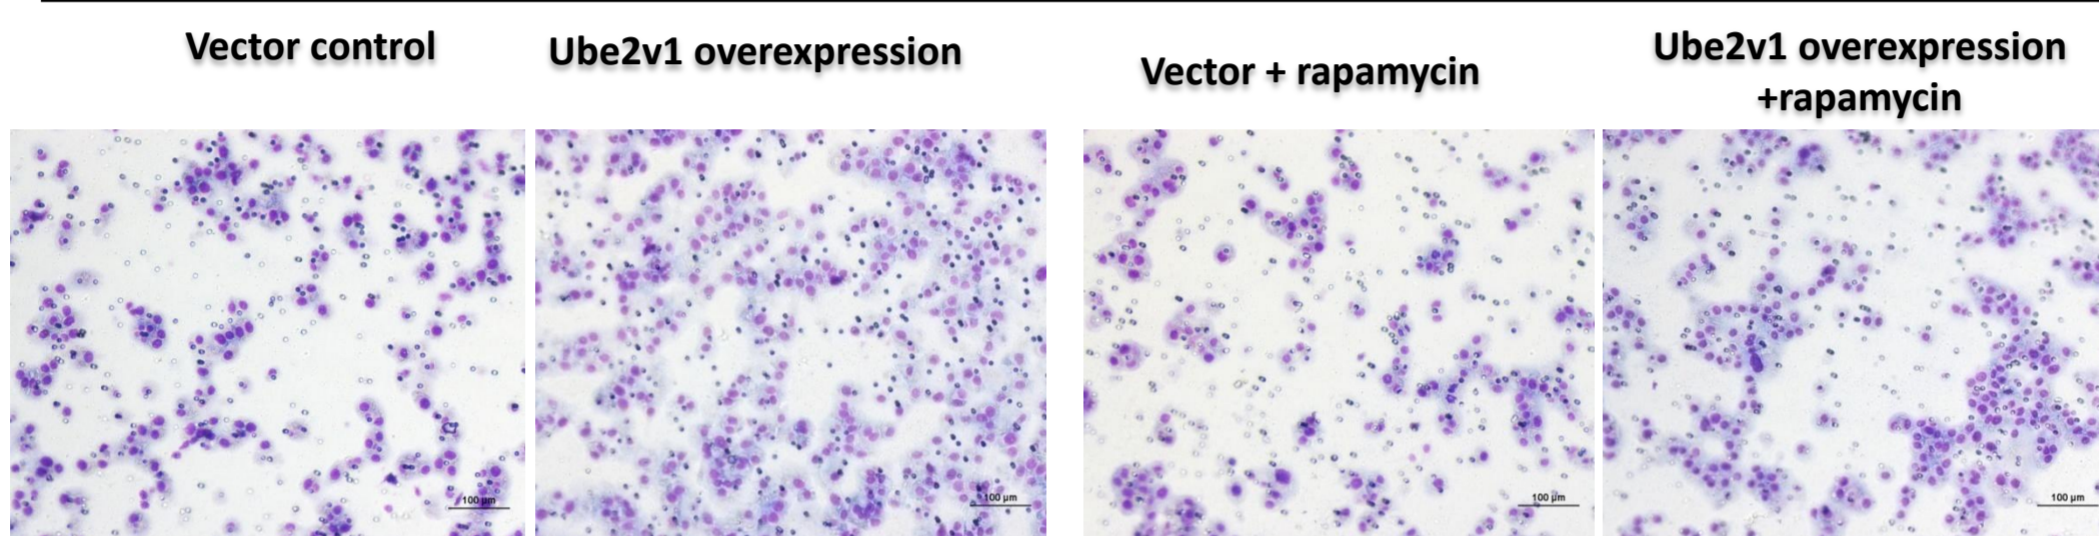

**C**

**Invasion**

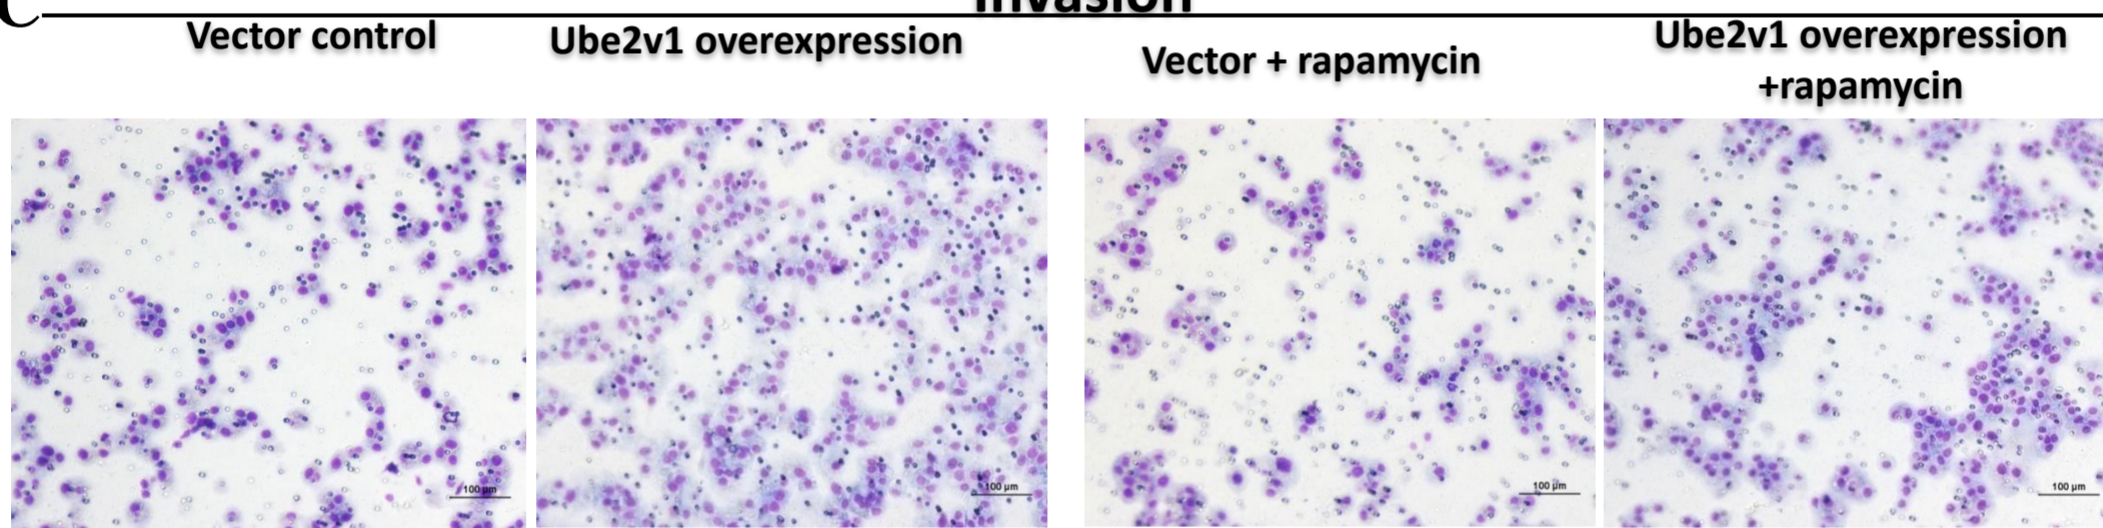

**Figure S7**

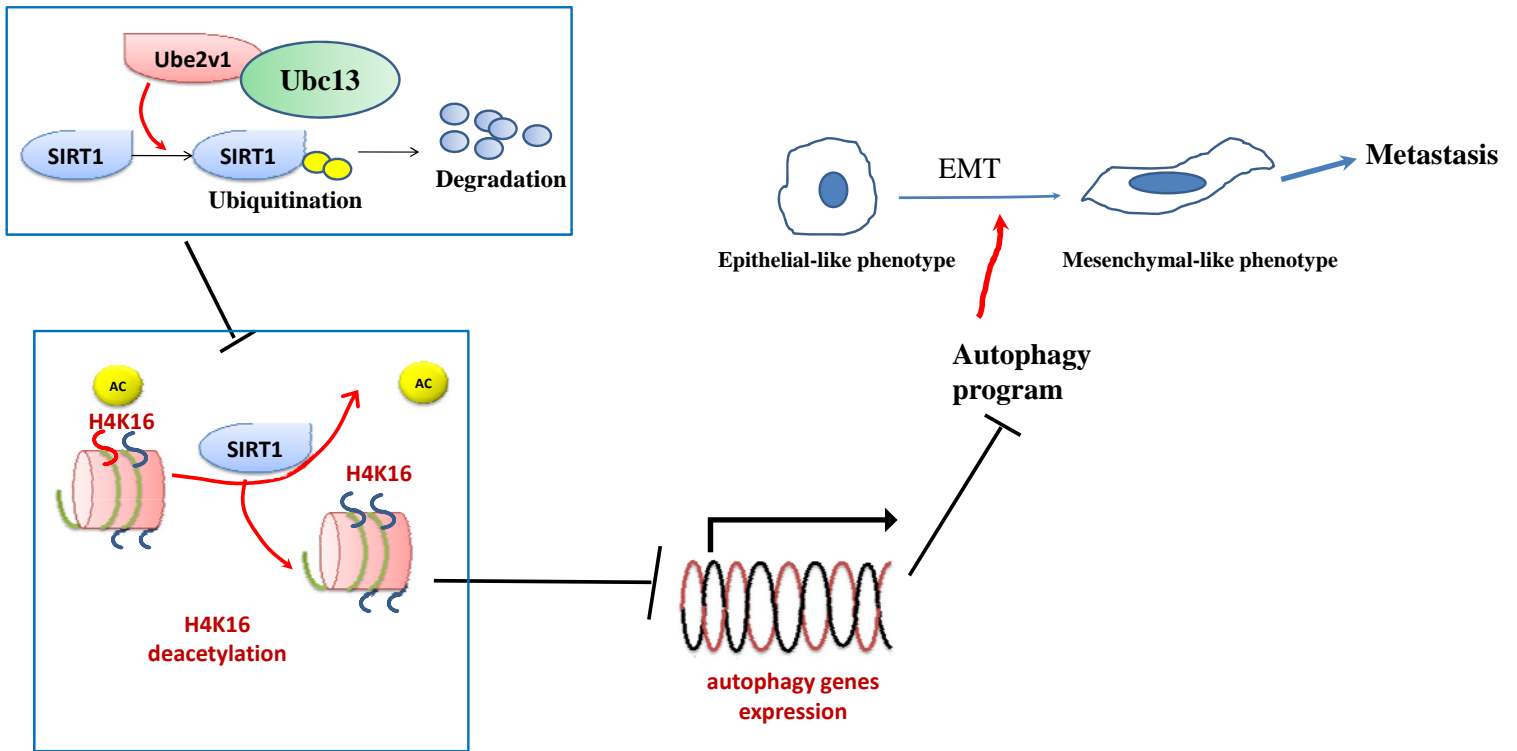

Supplement: MOESM3 [file 15959622]
