# Supplementary material for: Ube2v1-mediated ubiquitination and degradation of Sirt1 promotes metastasis of colorectal cancer by epigenetically suppressing autophagy
Source: PubMed Central journal article supplement (PMC6050692; doi:10.1186/s13045-018-0638-9), 2018-07-17
Supplement: 13045_2018_638_MOESM1_ESM.pdf [file 13045_2018_638_MOESM1_ESM.pdf]

# Report of Human Cell Line Authentication

(Notice: This authentication report is restricted to the cell sold from Guangzhou Cellcook Biotech Co., Ltd, and the date with seal is the date of delivery. )

## I . Sample

Sample Name: labeled as 'SW480'

## II . Method and Procedure

1. PCR is amplified with STR Multi-amplification Kit (PowerPlex™16HS System);
2. PCR products are assayed with 3100 DNA Analyzer (Applied Biosystems®).
3. Amplification of gene COX1 and electrophoresis are employed to survey the species of the sample.

## III. Results

1. The STR profiles of the cell line sample are in the attached table and figure.
2. The search result in ATCC and DSMZ databases.
3. The electrophoresis figure of gene COX1.

SW480: ①No loci has tri-alleles or tetra-alleles. Contamination of other human cell line is not found (Figure 1 & Table 1). ②100% matched cell lines are found in ATCC and DSMZ data banks. And the cell line named as "SW480" *et al.* (Figure 2 & Figure 3) ③The sample is a human cell line. Contamination of other species cells are not found in the sample (Figure 4).

Operator: Xiaohua Mo

Auditor: Xuanyi Liang

Guangzhou Cellcook Biotech Co., Ltd

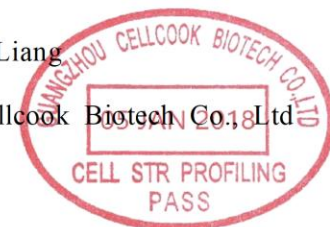

Figure 1. STR profiles of SW480 cell line

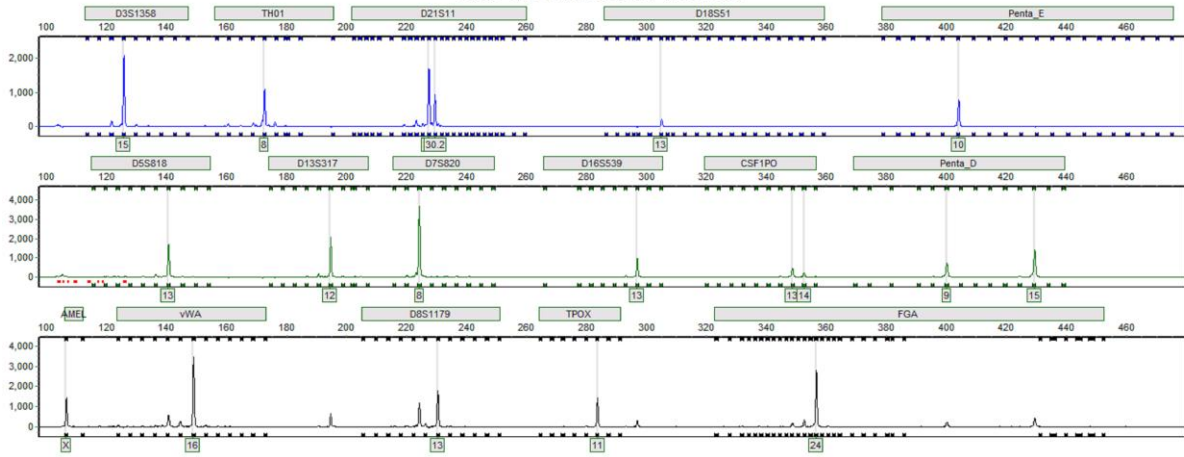

Table 1. STR profiles of SW480 cell line

|         | Allele1 | Allele2 |
|---------|---------|---------|
| D3S1358 | 15      |         |
| TH01    | 8       |         |
| D21S11  | 30      | 30.2    |
| D18S51  | 13      |         |
| Penta_E | 10      |         |
| D5S818  | 13      |         |
| D13S317 | 12      |         |
| D7S820  | 8       |         |
| D16S539 | 13      |         |
| CSF1PO  | 13      | 14      |
| Penta_D | 9       | 15      |
| AMEL    | x       |         |
| vWA     | 16      |         |
| D8S1179 | 13      |         |
| TPOX    | 11      |         |
| FGA     | 24      |         |

Figure 2. Search result in ATCC database

## SEARCH THE STR DATABASE

As part of our continuing efforts to characterize and authenticate the cell lines in the Cell Biology collection, ATCC has developed a comprehensive database of short tandem repeat (STR) DNA profiles for all of our human cell lines. [View our brief tutorial before starting.](#)

1. [STR Profiling Analysis](#)
2. [Matching Algorithm](#)
3. [Interrogating the Database](#)

Showing 1 - 3 Of 3

PageSize:

| Add to Cart              | %Match | ATCC® Number | Designation | D5S818 | D13S317 | D7S820 | D16S539 | vWA | TH01 | AMEL | TPOX | CSF1PO |
|--------------------------|--------|--------------|-------------|--------|---------|--------|---------|-----|------|------|------|--------|
| <input type="checkbox"/> | 83.33  | CCL-227      | SW-620      | 13     | 12      | 8,9    | 9,13    | 16  | 8    | X    | 11   | 13,14  |
| <input type="checkbox"/> | 100    | CCL-228      | SW-480      | 13     | 12      | 8      | 13      | 16  | 8    | X    | 11   | 13,14  |
| <input type="checkbox"/> | 90.91  | CRL-7940     | SW 527      | 13     | 12      | 8      | 9,13    | 16  | 8    | X    | 11   | 13,14  |

Add to Cart

Export to Excel

Figure 3. Search result in DSMZ database

**Result of STR matching analysis by your data.** - DSMZ Profile Database -

A graphical presentation is shown at the bottom of this page.

| EV          | Cell No. | Cell name                | Locus names |           |          |           |           |          |          |           |              | Figures |
|-------------|----------|--------------------------|-------------|-----------|----------|-----------|-----------|----------|----------|-----------|--------------|---------|
|             |          |                          | D5S818      | D13S317   | D7S820   | D16S539   | VWA       | TH01     | AM       | TPOX      | CSF1PO       |         |
|             |          | <i>Query (Your Cell)</i> | <i>13</i>   | <i>12</i> | <i>8</i> | <i>13</i> | <i>16</i> | <i>8</i> | <i>x</i> | <i>11</i> | <i>13,14</i> |         |
| 1.29(36/28) | 313      | SW-480                   | 13,13       | 12,12     | 8,8      | 13,13     | 16,16     | 8,8      | X,X      | 11,11     | 13,14        | -       |
| 1.29(36/28) | CCL-228  | SW480 [SW-480]           | 13,13       | 12,12     | 8,8      | 13,13     | 16,16     | 8,8      | X,X      | 11,11     | 13,14        | -       |
| 1.29(36/28) | CRL-2176 | SW-598                   | 13,13       | 12,12     | 8,8      | 13,13     | 16,16     | 8,8      | X,X      | 11,11     | 13,14        | -       |
| 1.21(34/28) | CRL-7940 | SW 527                   | 13,13       | 12,12     | 8,8      | 9,13      | 16,16     | 8,8      | X,X      | 11,11     | 13,14        | -       |
| 1.14(32/28) | CCL-227  | SW620 [SW-620]           | 13,13       | 12,12     | 8,9      | 9,13      | 16,16     | 8,8      | X,X      | 11,11     | 13,14        | -       |
| 0.86(24/28) | JCRB1031 | JHH-7                    | 13,13       | 12,12     | 8,11     | 13,13     | 16,18     | 6,6      | X,Y      | 9,11      | 13,14        | -       |
| 0.79(22/28) | CRL-2547 | Panc 10.05               | 13,13       | 12,12     | 8,9      | 9,12      | 16,16     | 6,9,3    | X,X      | 11,11     | 12,12        | -       |
| 0.79(22/28) | CRL-2558 | PL45                     | 13,13       | 12,12     | 8,9      | 9,12      | 16,16     | 6,9,3    | X,X      | 11,11     | 12,12        | -       |
| 0.71(20/28) | 680      | NALM-16                  | 11,11       | 12,12     | 10,10    | 13,13     | 17,17     | 8,8      | X,X      | 11,11     | 11,11        | -       |
| 0.71(20/28) | CRL-1848 | NCI-H292 [H292]          | 13,13       | 11,12     | 10,10    | 9,13      | 16,17     | 8,8      | X,X      | 8,11      | 10,10        | -       |

Figure 4. Authentication of the species of the sample

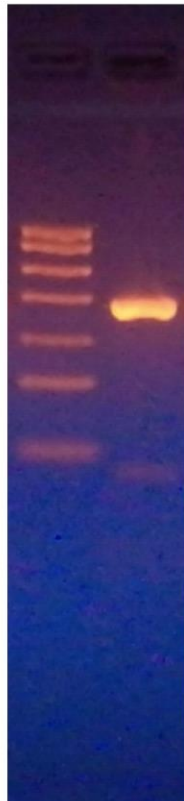

M: Marker. As the size of 700, 600, 500, 400, 300, 200 and 100bp from up to down.

Nine species are checked, as follow: *Homo sapiens* 391bp, *Cricetulus griseus* 315bp, *Macaca mulatta* 287bp, *Cercopithecus aethiops* 222bp, *Rattus norvegicus* 196bp, *Canis familiaris* 172bp, *Mus musculus* 150bp, *Bos Taurus* 102bp, IC 70bp

The sample: The band size is 391bp which matches the size of human.

# Report of Human Cell Line Authentication

(Notice: This authentication report is restricted to the cell sold from Guangzhou Cellcook Biotech Co., Ltd, and the date with seal is the date of delivery. )

## I . Sample

Sample Name: labeled as 'HCT-116'

## II . Method and Procedure

1. PCR is amplified with STR Multi-amplification Kit (PowerPlex™16HS System);
2. PCR products are assayed with 3100 DNA Analyzer (Applied Biosystems®).
3. Amplification of gene COX1 and electrophoresis are employed to survey the species of the sample.

## III. Results

1. The STR profiles of the cell line sample are in the attached table and figure.
2. The search result in ATCC and DSMZ databases.
3. The electrophoresis figure of gene COX1.

HCT-116: ①One loci has tri-alleles (D3S1358). Contamination of other human cell line is not found (Figure 1 & Table 1). ②100% matched cell lines are found in ATCC and DSMZ data banks. And the cell line named as "HCT-116" *et al.* (Figure 2 & Figure 3) ③The sample is a human cell line. Contamination of other species cells are not found in the sample (Figure 4).

Operator: Xiaohua Mo

Auditor: Xuanyi Liang

Guangzhou Cellcook Biotech Co., Ltd

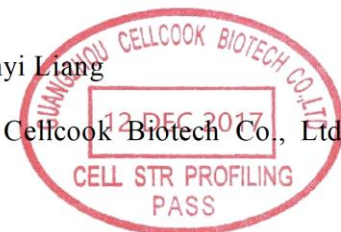

Figure 1. STR profiles of HCT-116 cell line

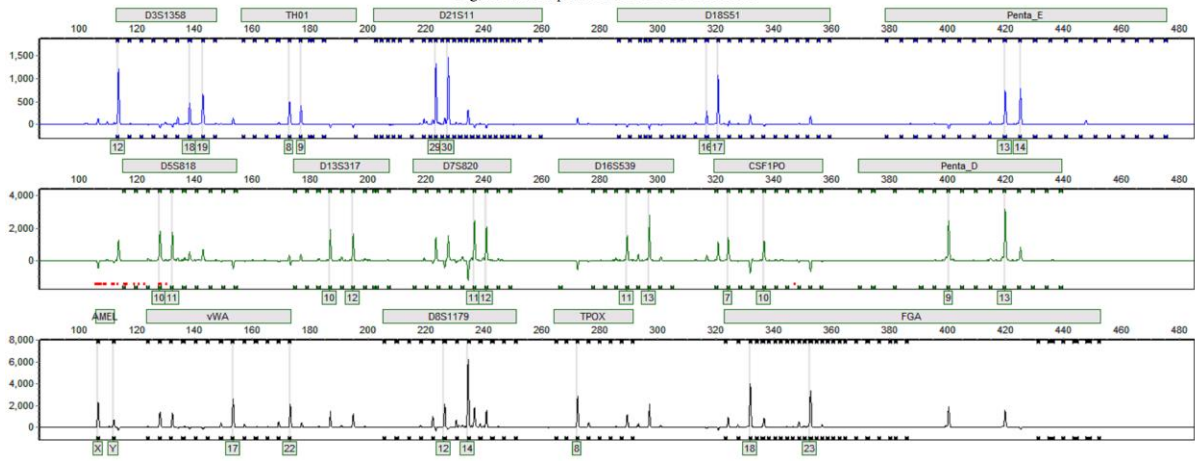



Table 1. STR profiles of HCT-116 cell line

|         | Allele1 | Allele2 | Allele3 |
|---------|---------|---------|---------|
| D3S1358 | 12      | 18      | 19      |
| TH01    | 8       | 9       |         |
| D21S11  | 29      | 30      |         |
| D18S51  | 16      | 17      |         |
| Penta_E | 13      | 14      |         |
| D5S818  | 10      | 11      |         |
| D13S317 | 10      | 12      |         |
| D7S820  | 11      | 12      |         |
| D16S539 | 11      | 13      |         |
| CSF1PO  | 7       | 10      |         |
| Penta_D | 9       | 13      |         |
| AMEL    | x       | Y       |         |
| vWA     | 17      | 22      |         |
| D8S1179 | 12      | 14      |         |
| TPOX    | 8       |         |         |
| FGA     | 18      | 23      |         |

Figure 2. Search result in ATCC database

## SEARCH THE STR DATABASE

As part of our continuing efforts to characterize and authenticate the cell lines in the Cell Biology collection, ATCC has developed a comprehensive database of short tandem repeat (STR) DNA profiles for all of our human cell lines. [View our brief tutorial before starting.](#)

1. [STR Profiling Analysis](#)
2. [Matching Algorithm](#)
3. [Interrogating the Database](#)

Showing 1 - 2 Of 2

PageSize: 100

| Add to Cart              | %Match | ATCC® Number | Designation | D5S818 | D13S317 | D7S820 | D16S539 | vWA   | TH01 | AMEL | TPOX | CSF1PO |
|--------------------------|--------|--------------|-------------|--------|---------|--------|---------|-------|------|------|------|--------|
| <input type="checkbox"/> | 100    | CCL-247      | HCT 116     | 10,11  | 10,12   | 11,12  | 11,13   | 17,22 | 8,9  | X,Y  | 8,9  | 7,10   |
| <input type="checkbox"/> | 87.5   | CRL-2780     | ATRFLOX     | 10,12  | 10,12   | 11,12  | 11,13   | 17,22 | 8,9  | X    | 8    | 7,9    |

**Disclaimer:** Reference to this database and the data contained therein may be cited in publications, and ATCC encourages such citation or reference. While every reasonable effort has been made to assure the accuracy of these data, no warranty, express or implied, is made by ATCC as to their accuracy.

Figure 3. Search result in DSMZ database

**Result of STR matching analysis by your data.** - DSMZ Profile Database -

A graphical presentation is shown at the bottom of this page.

| EV          | Cell No. | Cell name                | Locus names |         |         |          |          |       |     |      |        | Figures |
|-------------|----------|--------------------------|-------------|---------|---------|----------|----------|-------|-----|------|--------|---------|
|             |          |                          | D5S818      | D13S317 | D7S820  | D16S539  | VWA      | TH01  | AM  | TPOX | CSF1PO |         |
|             |          | <i>Query (Your Cell)</i> | 10,11       | 10,12   | 11,12   | 11,13    | 17,22    | 8,9   | X,Y | 8,9  | 7,10   |         |
| 1.00(36/36) | CCL-247  | HCT 116                  | 10,11       | 10,12   | 11,12   | 11,13    | 17,22    | 8,9   | X,Y | 8,9  | 7,10   | -       |
| 0.95(36/38) | 581      | HCT-116                  | 10,11       | 10,12   | 11,12   | 11,13,12 | 17,17,21 | 8,8   | X,X | 8,8  | 7,10   | -       |
| 0.89(32/36) | CRL-2780 | ATRFLOX [Mutatect]       | 10,12       | 10,12   | 11,12   | 11,13    | 17,22    | 8,9   | X,X | 8,8  | 7,9    | -       |
| 0.83(30/36) | CRL-1918 | CFPAC-1                  | 10,11       | 12,12   | 8,10    | 9,11     | 17,17    | 8,8   | X,Y | 8,8  | 10,10  | -       |
| 0.78(28/36) | CRL-1997 | HPAF-II                  | 11,13       | 12,12   | 10,13   | 11,13    | 17,17    | 9,9   | X,X | 8,8  | 10,11  | -       |
| 0.78(28/36) | CRL-5915 | NCI-H2052 [H2052]        | 11,11       | 12,12   | 12,12   | 11,13    | 17,17    | 7,9,3 | X,X | 8,11 | 10,11  | -       |
| 0.78(28/36) | RCB2266  | HE50                     | 11,12       | 10,12   | 8,9     | 11,11    | 17,17    | 9,9   | X,Y | 8,9  | 10,11  | -       |
| 0.78(28/36) | CRL-5963 | NCI-BL2052               | 11,11       | 12,12   | 11,12   | 11,13    | 17,17    | 7,9,3 | X,Y | 8,11 | 10,11  | -       |
| 0.76(28/37) | CRL-5874 | NCI-H1522 [H1522]        | 11,11       | 12,12   | 9,11,12 | 11,11    | 17,20    | 7,9,3 | X,Y | 8,11 | 10,10  | -       |
| 0.76(28/37) | CRL-5873 | NCI-H1514                | 11,11       | 12,12   | 9,12    | 11,11    | 17,21,22 | 7,9,3 | X,Y | 8,11 | 10,10  | -       |
| 0.72(26/36) | 104      | M-07e                    | 11,11       | 10,11   | 11,11   | 11,11    | 16,18    | 6,8   | X,X | 8,8  | 9,10   | -       |

Figure 4. Authentication of the species of the sample

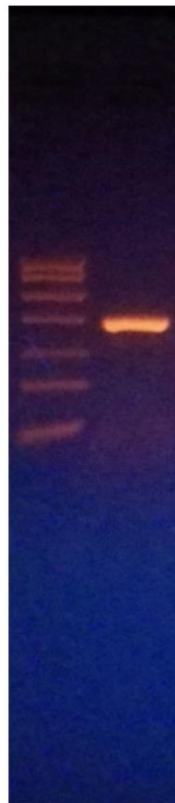

M: Marker. As the size of 700, 600, 500, 400, 300, 200 and 100bp from up to down.

Nine species are checked, as follow: *Homo sapiens* 391bp, *Cricetulus griseus* 315bp, *Macaca mulatta* 287bp, *Cercopithecus aethiops* 222bp, *Rattus norvegicus* 196bp, *Canis familiaris* 172bp, *Mus musculus* 150bp, *Bos Taurus* 102bp, IC 70bp

The sample: The band size is 391bp which matches the size of human.



# Report of Human Cell Line Authentication

(Notice: This authentication report is restricted to the cell sold from Guangzhou Cellcook Biotech Co., Ltd, and the date with seal is the date of delivery. )

## I . Sample

Sample Name: labeled as 'DLD1'

## II . Method and Procedure

1. PCR is amplified with STR Multi-amplification Kit (PowerPlex™16HS System);
2. PCR products are assayed with 3100 DNA Analyzer (Applied Biosystems®).
3. Amplification of gene COX1 and electrophoresis are employed to survey the species of the sample.

## III. Results

1. The STR profiles of the cell line sample are in the attached table and figure.
2. The search result in ATCC and DSMZ databases.
3. The electrophoresis figure of gene COX1.

DLD1: ①No loci has tri-alleles or tetra-alleles. Contamination of other human cell line is not found (Figure 1 & Table 1). ②100% matched cell lines are found in ATCC and DSMZ data banks. And the cell line named as "DLD1" *et al.* (Figure 2 & Figure 3) ③The sample is a human cell line. Contamination of other species cells are not found in the sample (Figure 4).

Operator: Xiaohua Mo

Auditor: Xuanyi Liang

Guangzhou Cellcook Biotech Co., Ltd

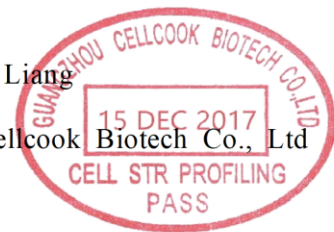

Figure 1. STR profiles of DLD1 cell line

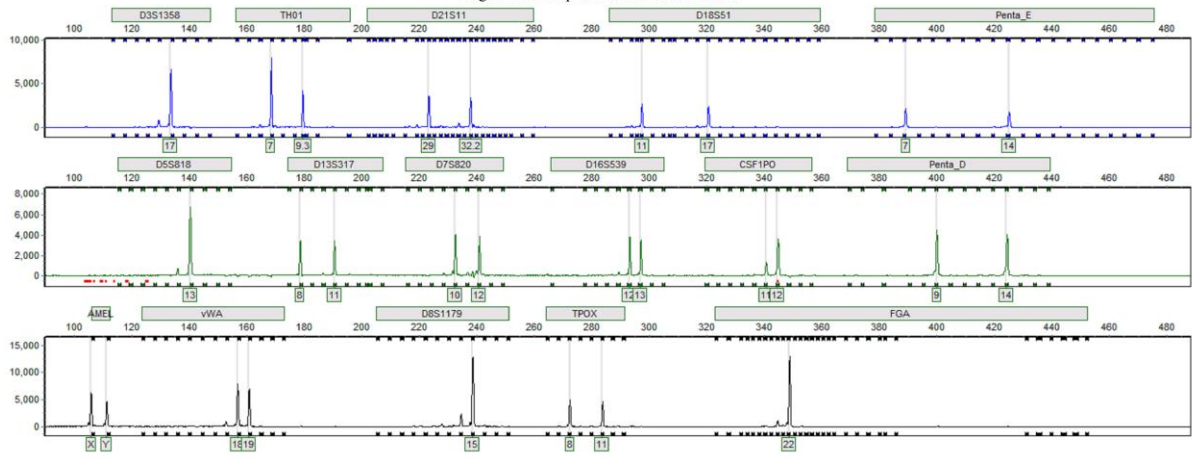

Table 1. STR profiles of DLD1 cell line

|         | Allele1 | Allele2 |
|---------|---------|---------|
| D3S1358 | 17      |         |
| TH01    | 7       | 9.3     |
| D21S11  | 29      | 32.2    |
| D18S51  | 11      | 17      |
| Penta_E | 7       | 14      |
| D5S818  | 13      |         |
| D13S317 | 8       | 11      |
| D7S820  | 10      | 12      |
| D16S539 | 12      | 13      |
| CSF1PO  | 11      | 12      |
| Penta_D | 9       | 14      |
| AMEL    | x       | y       |
| vWA     | 18      | 19      |
| D8S1179 | 15      |         |
| TPOX    | 8       | 11      |
| FGA     | 22      |         |

Figure 2. Search result in ATCC database

## SEARCH THE STR DATABASE

As part of our continuing efforts to characterize and authenticate the cell lines in the Cell Biology collection, ATCC has developed a comprehensive database of short tandem repeat (STR) DNA profiles for all of our human cell lines. [View our brief tutorial before starting.](#)

1. [STR Profiling Analysis](#)
2. [Matching Algorithm](#)
3. [Interrogating the Database](#)

Showing 1 - 7 Of 7

PageSize:

| Add to Cart              | %Match | ATCC® Number | Designation | D5S818 | D13S317 | D7S820     | D16S539 | vWA   | TH01  | AMEL | TPOX | CSF1PO |
|--------------------------|--------|--------------|-------------|--------|---------|------------|---------|-------|-------|------|------|--------|
| <input type="checkbox"/> | 100    | CCL-221      | DLD-1       | 13     | 8,11    | 10,12      | 12,13   | 18,19 | 7,9.3 | X,Y  | 8,11 | 11,12  |
| <input type="checkbox"/> | 100    | CCL-225      | HCT-15      | 13     | 8,11    | 10,12      | 12,13   | 18,19 | 7,9.3 | X,Y  | 8,11 | 12     |
| <input type="checkbox"/> | 94.12  | CCL-244      | HCT-8       | 13     | 8,11    | 10,11,3,12 | 12,13   | 18,19 | 7,9.3 | X,Y  | 8,11 | 12     |
| <input type="checkbox"/> | 80     | CRL-5838     | NCI-H720    | 11     | 11      | 10,12      | 13      | 18    | 6     | X    | 8    | 11     |
| <input type="checkbox"/> | 81.82  | CRL-5934     | NCI-H2227   | 13     | 8       | 10,12      | 9       | 16,18 | 9.3   | X    | 8    | 11     |
| <input type="checkbox"/> | 83.33  | CRL-5850     | NCI-H920    | 13     | 11      | 10,11      | 11,13   | 19    | 9.3   | X    | 8,11 | 12     |
| <input type="checkbox"/> | 100    | CRL-11663    | HRT-18G     | 13     | 8,11    | 10,12      | 12,13   | 18,19 | 7,9.3 | X,Y  | 8,11 | 12     |

Figure 3. Search result in DSMZ database

**Result of STR matching analysis by your data.** - DSMZ Profile Database -

A graphical presentation is shown at the bottom of this page.

| EV          | Cell No.  | Cell name                | Locus names |         |            |         |       |         |     |      |        | Figures |
|-------------|-----------|--------------------------|-------------|---------|------------|---------|-------|---------|-----|------|--------|---------|
|             |           |                          | D5S818      | D13S317 | D7S820     | D16S539 | VWA   | TH01    | AM  | TPOX | CSF1PO |         |
|             |           | <i>Query (Your Cell)</i> | 13          | 8,11    | 10,12      | 12,13   | 18,19 | 7,9,3   | X,Y | 8,11 | 11,12  |         |
| 1.03(36/35) | 278       | DLD-1                    | 13,13       | 8,11    | 10,12      | 12,13   | 18,19 | 7,9,3   | X,Y | 8,11 | 11,12  | -       |
| 1.03(36/35) | 357       | HCT-15                   | 13,13       | 8,11    | 10,12      | 12,13   | 18,19 | 7,9,3   | X,Y | 8,11 | 12,12  | -       |
| 1.03(36/35) | CCL-221   | DLD-1                    | 13,13       | 8,11    | 10,12      | 12,13   | 18,19 | 7,9,3   | X,Y | 8,11 | 11,12  | -       |
| 1.03(36/35) | CCL-225   | HCT-15                   | 13,13       | 8,11    | 10,12      | 12,13   | 18,19 | 7,9,3   | X,Y | 8,11 | 12,12  | -       |
| 1.03(36/35) | JCRB9094  | DLD-1                    | 13,13       | 8,11    | 10,12      | 12,13   | 18,19 | 7,9,3   | X,Y | 8,11 | 11,12  | -       |
| 1.03(36/35) | CRL-11663 | HRT-18G                  | 13,13       | 8,11    | 10,12      | 12,13   | 18,19 | 7,9,3   | X,Y | 8,11 | 12,12  | -       |
| 1.00(36/36) | CCL-244   | HCT-8 [HRT-18]           | 13,13       | 8,11    | 10,12,11.3 | 12,13   | 18,19 | 7,9,3   | X,Y | 8,11 | 12,12  | -       |
| 0.91(32/35) | CRL-5850  | NCI-H920 [H920]          | 13,13       | 11,11   | 10,11      | 11,13   | 19,19 | 9,3,9,3 | X,X | 8,11 | 12,12  | -       |
| 0.86(30/35) | CRL-5934  | NCI-H2227                | 13,13       | 8,8     | 10,12      | 9,9     | 16,18 | 9,3,9,3 | X,X | 8,8  | 11,11  | -       |
| 0.80(28/35) | 325       | SNB-19                   | 11,12       | 10,11   | 10,12      | 12,12   | 16,18 | 9,3,9,3 | X,Y | 8,8  | 11,12  | -       |

Figure 4. Authentication of the species of the sample

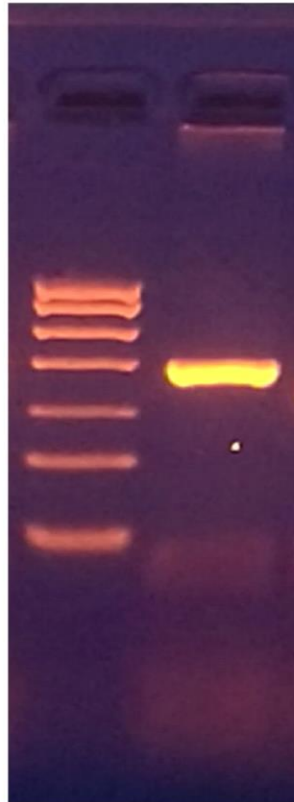

M: Marker. As the size of 700, 600, 500, 400, 300, 200 and 100bp from up to down.

Nine species are checked, as follow: *Homo sapiens* 391bp, *Cricetulus griseus* 315bp, *Macaca mulatta* 287bp, *Cercopithecus aethiops* 222bp, *Rattus norvegicus* 196bp, *Canis familiaris* 172bp, *Mus musculus* 150bp, *Bos Taurus* 102bp, IC 70bp

The sample: The band size is 391bp which matches the size of human.
