# Supplementary material for: Ube2v1-mediated ubiquitination and degradation of Sirt1 promotes metastasis of colorectal cancer by epigenetically suppressing autophagy
Source: Springer Nature journal article supplement (doi:10.1186/s13045-018-0638-9), 2018-07-17
Supplement: MOESM2 [file 15959622]

Table S1. Primers for qPCR or DNA sequencing

| Genes       | Primers                                                  |
|-------------|----------------------------------------------------------|
| Ube2v1      | F: AAAAGTCCCTCGCAATTTCC<br>R: CTGCCATTTTGCTAGCACTG       |
| LC3         | F: AGCAGCATCCAACCAAAATC<br>R: CTGTGTCCGTTACCAACAG        |
| Beclin1     | F: GCCCAGACAGGACTCTCTTAG<br>R: TGAACACACTTGCCAGTCTTC     |
| ATG16L1     | F: ATGCGCGGATTGTCTCAGG<br>R: GTCCACTCATTACACATTGCTCT     |
| ATG3        | F: GATGGCGGATGGGTAGATACA<br>R: TCTTCACATAGTGCTGAGCAATC   |
| ATG5        | F: AAAGATGTGCTTCGAGATGTGT<br>R: CACTTTGTGAGTTACCAACGTCA  |
| ATG7        | F: ATGATCCCTGTAACCTTAGCCCA<br>R: CACGGAAGCAAACAACCTTCAAC |
| ATG12       | F: TAGAGCGAACACGAACCATCC<br>R: CACTGCCAAAACACTCATAGAGA   |
| ATG10       | F: ATAAGATGCGACTGCTACAGGG<br>R: CAATGCTCAGCCATGATGTGAT   |
| ATG4a       | F: TGCTGGTTGGGGATGTATGC<br>R: GCGTTGGTATTCTTTGGGTTGT     |
| ATG4b       | F: GGTGTGGACAGATGATCTTTGC<br>R: CCAACTCCCATTGCGCTATC     |
| ATG4c       | F: TAGAGGATCACGTAATTGCAGGA<br>R: GTTGTCAAAGCTGAGCCTTCTAT |
| ATG4d       | F: CCAGCCCACTGTGGATGTC<br>R: AAGCCACGGTACAGCTTG          |
| Sirt1       | F: CAGTGTGATGGTTCCTTTGC<br>R: CACCGAGGAACTACCTGAT        |
| E-cadherin  | F: TGAGTGTCCCCGGTATCTTC<br>R: CAGTATCAGCCGCTTTCAGATTTT   |
| N-cadherin  | F: CACTGCTCAGGACCCAGAT<br>R: TAAGCCGAGTATGGTCC           |
| Vimentin    | F: GAGAAGTTTGCCGTTGAAGC<br>R: TCCAGCAGCTTCCTGTAGGT       |
| Fibronectin | F: CCGTGGGCAACTCTGTC<br>R: TGCGGCAGTTGTACAG              |
| 18sRNA      | F: GGACCAGAGCGAAAGCATTGTC<br>R: TCAATCTCGGGTGGCTGAACGC   |

**Table S2. Differential proteins between control cells and cells with Ube2v1 stable overexpression by quantitative mass spectrometry.**

| Accession    | Name                                         | Peptides(95%) | Fold ratio     |                |
|--------------|----------------------------------------------|---------------|----------------|----------------|
|              |                                              |               | Control/Ube2v1 | Ube2v1/Control |
| AAB08709     | Prothymosin alpha                            | 2             | 0.159          | 3.247          |
| BAH00241     | Ubiquitin-conjugating enzyme<br>E2 variant 2 | 2             | 0.361          | 2.414          |
| NP_002893    | Reticulocalbin-2                             | 1             | 0.554          | 1.737          |
| NP_001093163 | 60S ribosomal protein L31                    | 2             | 0.715          | 1.602          |
| NP_001289978 | Myosin regulatory light chain<br>12A         | 5             | 0.729          | 1.526          |
| NP_001004    | 40S ribosomal protein S9                     | 7             | 0.531          | 1.504          |

|              |                             |   |       |       |
|--------------|-----------------------------|---|-------|-------|
| NP_001006    | 40S ribosomal protein S11   | 3 | 0.716 | 1.504 |
| NP_001000    | 40S ribosomal protein S5    | 2 | 0.749 | 1.470 |
| AAP97139     | NSFL1 cofactor p47          | 1 | 0.757 | 1.466 |
| EEB45048     | cytochrome C                | 4 | 0.641 | 1.459 |
| NP_036555    | 60S ribosomal protein L13a  | 4 | 0.799 | 1.409 |
| NP_001949    | Elongation factor 1-alpha 2 | 8 | 0.750 | 1.394 |
| NP_000963    | 60S ribosomal protein L7a   | 8 | 0.780 | 1.368 |
| NP_000981    | 60S ribosomal protein L27a  | 3 | 0.699 | 1.348 |
| NP_001265518 | Hsc70-interacting protein   | 5 | 0.765 | 1.345 |
| AAD20951     | Reticulon                   | 1 | 0.706 | 1.336 |
| NP_001020    | 40S ribosomal protein S26   | 1 | 0.745 | 1.317 |
| NP_001003    | 40S ribosomal protein S8    | 5 | 0.747 | 1.284 |
| NP_001020092 | 60S ribosomal protein L9    | 6 | 0.721 | 1.273 |

|                  |                                             |                      |                       |                       |
|------------------|---------------------------------------------|----------------------|-----------------------|-----------------------|
| XP_544163        | PREDICTED: copine-3                         | 3                    | 0.561                 | 1.260                 |
| NP_001230059     | Isoform 2 of 60S ribosomal protein L13      | 2                    | 0.713                 | 1.245                 |
| NP_001269316     | isocitrate dehydrogenase [NADP] cytoplasmic | 3                    | 0.638                 | 1.236                 |
| NP_001290554     | 60S ribosomal protein L10                   | 6                    | 0.795                 | 1.228                 |
| NP_001001        | 40S ribosomal protein S6                    | 5                    | 0.800                 | 1.218                 |
| XP_003478800     | 60S ribosomal protein L22-like              | 1                    | 0.668                 | 1.207                 |
|                  |                                             |                      |                       |                       |
|                  |                                             |                      |                       |                       |
| <b>Accession</b> | <b>Name</b>                                 | <b>Peptides(95%)</b> | <b>Fold ratio</b>     |                       |
|                  |                                             |                      | <b>Control/Ube2v1</b> | <b>Ube2v1/Control</b> |
| NP_057215        | Ras-related protein Rab-10                  | 4                    | 6.636                 | 0.534                 |

|             |                                                      |    |       |       |
|-------------|------------------------------------------------------|----|-------|-------|
| NP_003899   | Eukaryotic translation initiation factor 2 subunit 2 | 1  | 5.175 | 0.000 |
| NP_077305   | EF-hand domain-containing protein D2                 | 3  | 4.029 | 0.746 |
| NP_000412   | Keratin, type I cytoskeletal 10                      | 2  | 3.564 | 0.769 |
| AAA92155    | Sorcin                                               | 1  | 3.084 | 0.000 |
| NP_066402   | Histone H2B type 1-J                                 | 3  | 2.943 | 0.481 |
| AAN59974.1  | Histone H2A                                          | 2  | 2.888 | 0.483 |
| NP_778224.1 | Histone H4                                           | 5  | 2.690 | 0.296 |
| NP_003522.1 | Histone H3.1                                         | 2  | 2.573 | 0.385 |
| NP_001419   | Isoform MBP-1 of Alpha-enolase                       | 13 | 2.211 | 0.449 |
| NP_006112   | Keratin, type II cytoskeletal 1                      | 2  | 2.178 | 0.563 |

|              |                                                |   |       |       |
|--------------|------------------------------------------------|---|-------|-------|
| NP_002087    | General transcription factor<br>IIF subunit 1  | 1 | 2.110 | 0.479 |
| NP_003008.1  | Serine/arginine-rich-splicing<br>factor 3      | 2 | 2.068 | 0.619 |
| NP_958844    | Isoform 3 of Histone H2A.V                     | 2 | 1.967 | 0.694 |
| NP_056121    | Ubiquitin carboxyl-terminal<br>hydrolase 24    | 1 | 1.877 | 0.000 |
| P23231       | Mitochondrial import receptor<br>subunit TOM70 | 1 | 1.835 | 0.000 |
| NP_003065    | SWI/SNF complex subunit<br>SMARCC1             | 2 | 1.816 | 0.000 |
| NP_001159579 | Isoform 3 of<br>Hydroxymethylglutaryl-CoA      | 1 | 1.707 | 0.000 |

|              |                                                                   |   |       |       |
|--------------|-------------------------------------------------------------------|---|-------|-------|
|              | synthase, mitochondrial                                           |   |       |       |
| AAH35103     | SNRPG protein                                                     | 1 | 1.613 | 0.505 |
| NP_060286    | Cell growth-regulating<br>nucleolar protein                       | 1 | 1.605 | 0.000 |
| NP_001164453 | Isoform 3 of Heterogeneous<br>nuclear ribonucleoproteins<br>C1/C2 | 2 | 1.596 | 0.597 |
| P02584       | Profilin-1                                                        | 3 | 1.596 | 0.000 |
| NP_001244120 | Probable ATP-dependent<br>RNA helicase DDX6                       | 1 | 1.565 | 0.682 |
| NP_004044    | Bystin                                                            | 1 | 1.560 | 0.000 |
| AAC39540     | Heterogeneous nuclear<br>ribonucleoprotein R                      | 6 | 1.558 | 0.734 |

|              |                                                                     |   |       |       |
|--------------|---------------------------------------------------------------------|---|-------|-------|
| NP_004634    | Polyadenylate-binding protein<br>2                                  | 1 | 1.543 | 0.000 |
| NP_001257889 | Nitric oxide<br>synthase-interacting protein                        | 1 | 1.540 | 0.000 |
| NP_998776.1  | Phosphate carrier protein,<br>mitochondrial                         | 1 | 1.537 | 0.000 |
| AAH36708     | Heterogeneous nuclear<br>ribonucleoprotein A/B                      | 4 | 1.520 | 0.577 |
| NP_006342    | Mitochondrial import inner<br>membrane translocase subunit<br>TIM44 | 3 | 1.506 | 0.674 |
| NP_00117163  | UDP-glucose<br>6-dehydrogenase isoform 3                            | 1 | 1.495 | 0.656 |



|                |                                                                                     |   |       |       |
|----------------|-------------------------------------------------------------------------------------|---|-------|-------|
| NP_002128      | heterogeneous nuclear<br>ribonucleoproteins A2/B1<br>isoform A2                     | 6 | 1.415 | 0.299 |
| NP_542165      | Spliceosome RNA helicase<br>DDX39B                                                  | 3 | 1.403 | 0.636 |
| NP_001106674.2 | Nascent<br>polypeptide-associated<br>complex subunit alpha,<br>muscle-specific form | 4 | 1.390 | 0.768 |
| NP_055317      | Pre-mRNA-processing factor<br>19                                                    | 2 | 1.386 | 0.754 |
| EAX02283       | Aldehyde dehydrogenase 1<br>family, member A3, isoform                              | 2 | 1.385 | 0.770 |

|              | CRA_b                                                  |    |       |       |
|--------------|--------------------------------------------------------|----|-------|-------|
| NP_001104547 | Ezrin                                                  | 21 | 1.379 | 0.702 |
| P02769       | Serum albumin                                          | 11 | 1.366 | 0.736 |
| Q14978       | Nucleolar and coiled-body<br>phosphoprotein 1          | 3  | 1.363 | 0.539 |
| NP_055969    | LDLR chaperone MESD                                    | 3  | 1.354 | 0.716 |
| NP_005110    | Thyroid hormone<br>receptor-associated protein 3       | 2  | 1.354 | 0.779 |
| NP_001153147 | heterogeneous nuclear<br>ribonucleoprotein Q isoform 4 | 10 | 1.311 | 0.793 |
| NP_005907    | DNA replication licensing<br>factor MCM7               | 4  | 1.289 | 0.716 |
| NP_000692    | sodium/potassium-transporting                          | 2  | 1.285 | 0.646 |

|           |                                              |   |       |       |
|-----------|----------------------------------------------|---|-------|-------|
|           | ATPase subunit alpha-1<br>isoform a          |   |       |       |
| NP_687033 | proteasome subunit alpha<br>type-3 isoform 2 | 2 | 1.282 | 0.756 |
| P12763    | Alpha-2-HS-glycoprotein<br>precursor         | 3 | 1.241 | 0.787 |
| NP_005773 | THO complex subunit 4                        | 3 | 1.220 | 0.699 |
